# Supplementary material for: Drought and rewatering effects on soybean photosynthesis, physiology and yield
Source: PeerJ journal article supplement (doi:10.7717/peerj.19658), 2025-07-03
Supplement: Ci_and_Ls.xls [file Ci_and_Ls.xls]

## Sheet: FH FL 07
	PARi	Ci	Ci/Ca	Ls		PARi	Ci	Ci/Ca	Ls		PARi	Ci	Ci/Ca	Ls
	PPFD	FL 07-Ci	out	FL 07-Ls		PPFD	FH 07-Ci	out	FH 07-Ls		PPFD	CK-Ci	out	CK-Ls
15	0.901931	696.902	2.22114	-1.22114	15	1.04137	737.56	2.76536	-1.76536	15	1.21492	681.863	1.69331	-0.693313
14	11.0143	598.765	1.98481	-0.984812	14	10.8978	690.098	2.29539	-1.29539	14	11.1489	580.664	1.44601	-0.446014
13	20.7204	484.3	1.55978	-0.559775	13	20.5845	600.48	1.83261	-0.832611	13	20.7004	480.13	1.19968	-0.199675
12	40.4781	398.683	1.20695	-0.206948	12	40.0724	490.747	1.09597	-0.0959746	12	39.9601	403.414	1.0116	-0.0115988
11	68.9701	334.904	0.72333	0.27667	11	70.276	384.096	0.611607	0.388393	11	70.2865	320.714	0.80801	0.19199
10	100.381	279.758	0.491205	0.508795	10	99.6056	293.502	0.336112	0.663888	10	99.4221	290.775	0.735432	0.264568
9	199.366	182.707	0.211125	0.788875	9	199.718	194.093	-0.00156151	1.00156	9	199.338	171.451	0.439856	0.560144
8	400.151	120.621	-0.165406	1.16541	8	399.326	121.156	-0.161861	1.16186	8	399.916	109.2	0.152056	0.897944
7	600.256	110.912	-0.217528	1.21753	7	600.661	119.154	-0.263411	1.26341	7	600.098	99.7236	0.0783903	1.1161
6	800.68	108.842	-0.240703	1.2407	6	801.094	120.523	-0.294127	1.29413	6	800.686	97.2327	0.0511134	1.14889
5	1000.91	112.192	-0.200234	1.20023	5	999.595	122.358	-0.354915	1.35491	5	1000.14	96.5956	0.0923631	1.15764
4	1201.22	111.607	-0.156931	1.15693	4	1201.1	118.643	-0.333958	1.33396	4	1201.02	95.4618	0.11085	1.18915
3	1501.41	110.804	-0.0748056	1.13481	3	1500.95	110.439	-0.270901	1.2709	3	1501.27	96.1861	0.145546	1.18545
2	1800.04	112.792	-0.0102259	1.13023	2	1801.27	116.687	-0.299681	1.29968	2	1800.25	96.5276	0.210868	1.17891
1	2000.81	110.074	0.0352754	1.13472	1	1999.92	113.463	-0.261749	1.26175	1	1998.91	96.4641	0.20815	1.15918

## Sheet: FH FL 07-R and 14
	PARi	Ci	Ci/Ca	Ls	PARi	Ci	Ci/Ca	Ls	PARi	Ci	Ci/Ca	Ls	PARi	Ci	Ci/Ca	Ls	PARi	Ci	Ci/Ca	Ls
	in	FL 14-Ci	out	FL 14-Ls	in	CK-Ci	out	CK-Ls	in	FH 14-Ci	out	FH 14-Ls	in	FL 07-R-Ci	out	FL 07-R-Ls	in	FH 07-R-Ci	out	FH 07-R-Ls
15	1.50984	638.899	1.58353	-0.58353	2.12938	490.464	1.21437	-0.214373	1.79248	566.505	1.40434	-0.404343	1.51603	513.642	2.05566	-0.25566	2.29243	504.846	1.66877	-0.268768
14	9.82553	590.777	1.46718	-0.467184	8.79092	478.517	1.18613	-0.18613	8.59907	540.414	1.34089	-0.340893	10.0024	495.077	1.91366	-0.191366	9.2239	476.02	1.59909	-0.199088
13	20.2971	549.33	1.36658	-0.36658	20.6125	456.552	1.13419	-0.134194	20.6256	499.397	1.24133	-0.241329	20.9742	458.352	1.70305	-0.150305	19.7809	450.635	1.34214	-0.134135
12	38.7381	501.62	1.25083	-0.250827	40.9961	431.153	1.074	-0.0739994	41.2679	437.221	1.09044	-0.0904418	39.9265	440.974	1.63598	-0.0635983	40.2608	427.846	1.24892	-0.0948925
11	69.3289	441.472	1.10392	-0.103924	69.956	405.712	1.01374	-0.0137425	70.5682	397.317	0.993501	0.00649891	69.7357	423.297	1.20277	-0.0790277	69.6425	407.638	1.09155	-0.0115483
10	99.344	395.668	0.991549	0.00845145	99.745	382.041	0.957025	0.0429752	100.654	291.681	0.89194	0.15806	100.508	393.848	1.03213	0.0721265	100.119	390.459	0.908733	0.0712674
9	199.528	308.781	0.777951	0.222049	199.966	330.506	0.834181	0.165819	199.888	284.954	0.822688	0.277312	199.605	342.205	0.759352	0.140648	200.024	337.03	0.721594	0.178406
8	398.944	251.996	0.63841	0.36159	399.092	292.529	0.743551	0.256449	401.167	216.809	0.743833	0.430167	398.99	307.968	0.604078	0.255922	398.772	299.01	0.564183	0.245817
7	601.554	236.611	0.601178	0.398822	600.421	283.877	0.723274	0.276726	600.397	199.087	0.731166	0.458834	600.87	299.168	0.559407	0.280593	601.364	280.758	0.554291	0.265709
6	799.94	222.127	0.566069	0.423931	799.856	285.065	0.727491	0.272509	801.227	201.937	0.728704	0.461296	800	307.717	0.507246	0.282754	799.095	290.997	0.543069	0.256931
5	1001.17	227.591	0.581201	0.418799	1001.07	285.674	0.730209	0.269791	999.441	202.278	0.559591	0.470409	1000.51	314.275	0.524347	0.285653	1000.27	296.44	0.502872	0.249713
4	1201.37	228.38	0.585022	0.414978	1201.09	289.713	0.741535	0.258465	1200.39	204.425	0.515015	0.484985	1200.58	313.322	0.521848	0.278152	1200.77	294.74	0.549303	0.250697
3	1499.1	226.648	0.582681	0.417319	1500.94	297.729	0.763414	0.236586	1501.29	205.215	0.532125	0.467875	1500.38	320.29	0.518888	0.271112	1501	289.462	0.518651	0.248135
2	1800.58	228.846	0.58988	0.41012	1801.14	302.377	0.776977	0.233023	1800.42	205.521	0.533709	0.466291	1799.59	310.98	0.519921	0.270079	1800.92	289.473	0.512263	0.248774
1	2000.27	236.115	0.609175	0.390825	2000.42	303.604	0.780993	0.229007	1999.34	213.345	0.554632	0.445368	1999.62	309.864	0.507608	0.272392	1998.62	291.675	0.518064	0.248194
																																		15
																																		14
																																		13
																																		12
																																		11
																																		10
																																		9
																																		8
																																		7
																																		6
																																		5
																																		4
																																		3
																																		2
																																		1

## Sheet: FH FL 14-R and 21
	PARi	Ci	Ci/Ca	Ls	PARi	Ci	Ci/Ca	Ls	PARi	Ci	Ci/Ca	Ls	PARi	Ci	Ci/Ca	Ls	PARi	Ci	Ci/Ca	Ls
	in	FL 21-Ci	out	FL 21-Ls	in	FH 21-Ci	out	FH 21-Ls	in	CK-Ci	out	CK-Ls	in	FH 14-R-Ci	out	FH 14-R-Ls	in	FL 14-R-Ci	out	FL 14-R-Ls
15	1.80398	440.849	1.19339	-0.193387	0.87216	524.446	1.45388	-0.453881	1.11558	387.471	1.03776	-0.0377571	1.2061	484.593	1.3195	-0.319504	1.0004	438.643	1.1737	-0.173698
14	10.0688	450.856	1.215	-0.214998	10.8823	458.011	1.27113	-0.271134	10.8291	379.244	1.01557	-0.0155705	9.66076	469.308	1.26895	-0.268955	10.8624	417.133	1.12208	-0.122075
13	20.9523	421.871	1.13994	-0.139935	20.274	391.969	1.10296	-0.102961	20.1742	375.124	1.00688	-0.00687717	20.6108	419.128	1.13441	-0.134412	20.3369	397.034	1.07735	-0.0773526
12	40.2575	385.402	1.03962	-0.0396217	39.1559	401.22	1.0961	-0.0960994	39.3509	369.714	1.00206	-0.00206377	39.8547	396.405	1.06951	-0.0695092	40.6581	370.557	1.01672	-0.0167195
11	70.0697	351.288	0.952338	0.0476622	70.1269	300.04	0.824992	0.175008	68.7733	361.45	0.983433	0.0165667	69.4972	356.184	0.960046	0.0399536	70.3864	353.303	0.971037	0.0289626
10	98.8368	331.191	0.887738	0.112262	100.323	270.319	0.763918	0.236082	99.5276	355.642	0.97583	0.0241695	100.218	315.304	0.853491	0.146509	98.9283	331.347	0.913585	0.0864149
9	200.226	277.621	0.748217	0.251783	200.357	220.363	0.628589	0.371411	200.143	342.119	0.950681	0.049319	198.616	271.727	0.742647	0.257353	200.954	305.269	0.844991	0.155009
8	401.432	249.577	0.682818	0.317182	399.516	198.687	0.57185	0.42815	399.893	322.104	0.91296	0.0870403	400.583	221.02	0.614377	0.385623	399.569	280.122	0.789529	0.210471
7	600.534	263.563	0.731301	0.268699	600.129	188.638	0.538201	0.461799	600.072	317.315	0.920964	0.0790359	600.979	201.114	0.560317	0.439683	601.434	277.866	0.788186	0.211814
6	799.679	271.56	0.755985	0.244015	800.461	190.851	0.540374	0.459626	800.57	317.818	0.923393	0.0766074	800.941	197.243	0.550933	0.449067	800.088	278.677	0.793377	0.206623
5	999.958	273.023	0.7653	0.2347	1001.24	169.871	0.492901	0.507099	999.457	317.685	0.926614	0.073386	999.522	197.732	0.551688	0.448312	998.892	281.423	0.79877	0.20123
4	1200.99	275.875	0.773209	0.226791	1199.37	172.132	0.496576	0.503424	1201.06	317.905	0.93079	0.0692099	1200.19	203.119	0.568964	0.431036	1200.11	279.699	0.791496	0.208504
3	1500.41	288.643	0.798813	0.201187	1499.94	176.529	0.498665	0.501335	1499.88	318.25	0.936718	0.0632817	1501.13	202.225	0.566456	0.433544	1500.78	292.1	0.824679	0.175321
2	1800.46	300.081	0.821504	0.178496	1800.91	171.539	0.484568	0.515432	1800.82	319.72	0.938667	0.0613329	1799.56	198.475	0.558441	0.441559	1801.17	298.43	0.8515	0.1485
1	1999.75	304.643	0.84973	0.15027	1999.7	185.309	0.523466	0.476534	2000.01	321.208	0.940566	0.0594341	2000.62	197.32	0.553574	0.446426	1999.23	301.756	0.870869	0.129131

## Sheet: FH FL 21-R
	PARi	FL 21-R-Ci	Ci/Ca	FL 21-R-Ls	PARi	FH 21-R-Ci	Ci/Ca	FH 21-R-Ls	in	CK-Ci	out	CK-Ls
15	1	422	1.16988	-0.169877	0	450	1.2475	-0.247499	1.11558	387.471	1.03776	-0.0377571
14	10	412	1.14344	-0.143437	9	430	1.19339	-0.193393	10.8291	379.244	1.01557	-0.0155705
13	20	382	1.07491	-0.074909	19	385	1.08335	-0.0833506	20.1742	375.124	1.00688	-0.00687717
12	39	384	1.04906	-0.0490571	40	375	1.02447	-0.0244698	39.3509	369.714	1.00206	-0.00206377
11	70	352	0.967864	0.0321364	70	301	0.827633	0.172367	68.7733	361.45	0.983433	0.0165667
10	99	335	0.946707	0.0532933	99	304	0.859101	0.140899	99.5276	355.642	0.97583	0.0241695
9	200	308	0.878573	0.121427	200	244	0.696012	0.303988	200.143	342.119	0.950681	0.049319
8	399	280	0.805882	0.194118	399	181	0.520945	0.479055	399.893	322.104	0.91296	0.0870403
7	600	278	0.793159	0.206841	600	170	0.485025	0.514975	600.072	317.315	0.920964	0.0790359
6	801	283	0.801283	0.198717	801	170	0.481336	0.518664	800.57	317.818	0.923393	0.0766074
5	1000	293.591	0.819143	0.180857	1001	178	0.516489	0.483511	999.457	317.685	0.926614	0.073386
4	1200	293.522	0.822195	0.177805	1200	194	0.559661	0.440339	1201.06	317.905	0.93079	0.0692099
3	1500	292.588	0.819573	0.180427	1500	205	0.582881	0.417119	1499.88	318.25	0.936718	0.0632817
2	1800	294.861	0.829639	0.170361	1801	221	0.625091	0.374909	1800.82	319.72	0.938667	0.0613329
1	2001	292.826	0.821515	0.178485	1998	228.979	0.646828	0.353172	2000.01	321.208	0.940566	0.0594341

## Sheet: SH SL 07
		PARi	SH 07-Ci	Ci/Ca	SH 07-Ls	PARi	SL 07-Ci	Ci/Ca	SL 07-Ls	PARi	CK-Ci	Ci/Ca	CK-Ls
	15	1	530	1.47831	-0.478309	0	488	1.37852	-0.378516	1.79248	566.505	1.40434	-0.404343
	14	9	411	1.12516	-0.125157	9	494	1.39546	-0.395465	8.59907	540.414	1.34089	-0.340893
	13	21	390	1.07931	-0.0793148	19	448	1.26552	-0.265523	20.6256	499.397	1.24133	-0.241329
	12	41	276	0.773559	0.226441	40	310	0.894304	0.105696	41.2679	437.221	1.09044	-0.0904418
	11	71	284	0.796071	0.203929	70	343	0.995257	0.00474268	70.5682	397.317	0.993501	0.00649891
	10	100	200	0.556772	0.443228	101	259	0.73333	0.26667	100.654	355.525	0.89194	0.10806
	9	200	132	0.366257	0.633743	200	175	0.499291	0.500709	199.888	215.589	0.542688	0.457312
	8	400	122.482	0.335098	0.664902	400	144.27	0.415231	0.584769	401.167	205.235	0.523383	0.476617
	7	600	117	0.315327	0.684673	601	152.045	0.433711	0.566289	600.397	207.009	0.531166	0.468834
	6	801	131	0.351137	0.648863	801	160	0.452158	0.547842	801.227	228.614	0.588704	0.411296
	5	1001	164	0.444602	0.555398	1001	188	0.516927	0.483073	999.441	247.804	0.639591	0.360409
	4	1201	176	0.47476	0.52524	1200	196	0.535456	0.464544	1200.39	257.072	0.665015	0.334985
	3	1502	191.504	0.517463	0.482537	1500	215	0.604988	0.395012	1501.29	263.063	0.682125	0.317875
	2	1801	214	0.576702	0.423298	1801	225	0.62445	0.37555	1800.42	267.133	0.693709	0.306291
	1	2001	235	0.63615	0.36385	2001	238	0.659788	0.340212	1999.34	274.891	0.714632	0.285368

## Sheet: SH SL 07-R and 14
	in	SL 14-Ci	out	SL 14-Ls	in	SH 14-Ci	out	SH 14-Ls	in	CK-Ci	out	CK-Ls	PARi	SH 7-R-Ci	Ci/Ca	SH 7-R-Ls	PARi	SL 7-R-Ci	Ci/Ca	SL 7-R-Ls
15	0.667831	520.524	1.33065	-0.330653	1.67303	538.748	1.36867	-0.368669	0.774117	572.785	1.4611	-0.461103	1.63941	527.397	1.35144	-0.351439	0.730247	589.519	1.48533	-0.485327
14	10.7691	528.323	1.35647	-0.356468	9.98484	516.421	1.32543	-0.325434	10.7051	537.156	1.37016	-0.37016	9.95578	466.812	1.20248	-0.202484	10.684	570.476	1.43828	-0.438279
13	18.5895	516.767	1.34152	-0.341519	21.0413	572.459	1.47269	-0.472693	20.2863	536.935	1.36906	-0.369063	20.9214	442.905	1.13828	-0.138285	18.6928	554.318	1.39037	-0.390368
12	39.6741	412.218	1.07383	-0.0738292	40.4998	453.352	1.15571	-0.155712	41.2592	505.545	1.29682	-0.296821	40.1956	352.063	0.905204	0.0947956	39.7927	431.03	1.07014	-0.0701447
11	68.7812	283.887	0.73672	0.26328	69.9752	291.693	0.752926	0.247074	69.1741	421.829	1.0913	-0.0913	69.8108	231.662	0.596851	0.403149	69.6165	353.482	0.865732	0.134268
10	100.242	209.705	0.544612	0.455388	100.802	237.243	0.612053	0.387947	99.8717	377.195	0.981644	0.018356	100.957	168.359	0.438691	0.561309	100.699	222.834	0.546405	0.453595
9	200.095	112.753	0.297742	0.702258	199.434	78.3784	0.205335	0.794665	200.424	213.357	0.563492	0.436508	201.322	125.76	0.330258	0.669742	200.042	118.609	0.219478	0.780522
8	401.136	95.4211	0.255184	0.744816	400.006	50.4548	0.133349	0.866651	400.056	194.288	0.523759	0.476241	399.703	113.351	0.299582	0.700418	399.288	60.4102	0.15046	0.84954
7	601.416	99.7754	0.269061	0.730939	601.015	58.0563	0.153178	0.846822	600.922	201.407	0.551725	0.448275	601.161	101.719	0.268771	0.731229	600.766	70.7118	0.175327	0.824673
6	800.392	110.153	0.295933	0.704067	799.647	64.8021	0.171805	0.828195	800.442	204.922	0.566756	0.433244	801.194	98.4162	0.260634	0.739366	799.019	66.7456	0.164706	0.835294
5	999.835	113.387	0.304615	0.695385	999.816	68.379	0.180998	0.819002	1000.73	216.05	0.59888	0.40112	999.716	101.433	0.269748	0.730252	1000.18	72.7231	0.179812	0.820188
4	1200.18	120.668	0.326739	0.673261	1200.06	65.9813	0.174256	0.825744	1199.99	223.305	0.620072	0.379928	1200.87	115.737	0.308479	0.691521	1200.04	78.5637	0.193548	0.806452
3	1501.13	123.478	0.334467	0.665533	1500.51	76.0533	0.202331	0.797669	1500.27	234.036	0.651047	0.348953	1500.89	120.857	0.321253	0.678747	1500.15	80.705	0.202232	0.797768
2	1800.32	126.742	0.343425	0.656575	1799.82	70.2493	0.187202	0.812798	1800.53	255.822	0.706899	0.293101	1800.18	125.966	0.334773	0.665227	1801.15	84.3842	0.211769	0.788231
1	1998.98	125.426	0.337775	0.662225	2000.02	78.8253	0.210117	0.789883	2000.43	262.426	0.724241	0.275759	1999.15	125.76	0.337712	0.662288	2000.83	94.4952	0.236645	0.763355

## Sheet: SH SL 14-R and 21
	PARi	SL 21-Ci	Ci/Ca	SL 21-Ls	PARi	SH 21-Ci	Ci/Ca	SH 21-Ls	PARi	CK-Ci	Ci/Ca	CK-Ls	PARi	SL 14-R-Ci	Ci/Ca	SL 14-R-Ls	PARi	SH 14-R-Ci	Ci/Ca	SH 14-R-Ls
15	1	706	1.82147	-0.821472	1	754	1.32993	-0.329934	0	592.785	1.54106	-0.541059	1	601	1.54602	-0.546016	2	570	1.46627	-0.466272
14	10	646	1.66515	-0.665145	10	717	1.84238	-0.842379	9	557	1.44645	-0.446453	10	523	1.34388	-0.343883	10	460	1.182	-0.182001
13	20	609	1.56565	-0.565653	20	683	1.7513	-0.751296	19	546.935	1.41821	-0.41821	19	501	1.28463	-0.284626	20	435	1.11539	-0.115394
12	41	524	1.34229	-0.342289	41	616	1.57668	-0.576681	40	515.545	1.29883	-0.298831	40	477	1.2209	-0.220904	40	380	0.972628	0.0273721
11	70	479.4	1.22424	-0.224244	70	564.7	1.44343	-0.443426	70	421.829	1.16696	-0.166963	70	357	0.912525	0.0874749	70	322	0.823062	0.176938
10	100	447.6	1.14067	-0.140668	101	512	1.30663	-0.306634	100	387.195	1.39722	-0.397221	100	323	0.824303	0.175697	100	288	0.734982	0.265018
9	200	382	0.97058	0.0294205	200	418	1.065	-0.0649979	199	229.357	0.842337	0.157663	200	199.3	0.507785	0.492215	200	158.4	0.403578	0.596422
8	400	320.4	0.811706	0.188294	401	358	0.909967	0.0900333	400	205.288	0.704308	0.295692	401	148	0.376187	0.623813	399	109	0.277057	0.722943
7	600	295.5	0.744491	0.255509	601	318	0.802617	0.197383	601	199.407	0.575706	0.424294	599	134.4	0.339219	0.660781	600	105	0.265015	0.734985
6	801	269	0.674118	0.325882	799	309	0.774055	0.225945	800	195.922	0.488636	0.511364	799	98.5	0.246746	0.753254	802	69.5	0.1741	0.8259
5	1000	255.6	0.639142	0.360858	1001	299	0.747104	0.252896	1002	206.05	0.515234	0.484766	999	86.3	0.215636	0.784364	1001	63	0.157416	0.842584
4	1201	255.5	0.637109	0.362891	1200	289	0.719897	0.280103	1201	215.305	0.536977	0.463023	1201	77.6	0.193301	0.806699	1200	62.5	0.155687	0.844313
3	1500	267.8	0.666212	0.333788	1500	295	0.732857	0.267143	1500	227.036	0.564334	0.435666	1501	82.4	0.204703	0.795297	1501	61	0.15154	0.84846
2	1800	276	0.685441	0.314559	1800	294	0.728756	0.271244	1799	249.822	0.619866	0.380134	1801	97.8	0.242423	0.757577	1800	63.3	0.156906	0.843094
1	1999	279	0.69151	0.30849	2000	289	0.715555	0.284445	2000	255.426	0.633191	0.366809	2001	93.1	0.230513	0.769487	2000	67.8	0.167871	0.832129

## Sheet: SH SL 21-R
	PARi	SL 21-R-Ci	Ci/Ca	SL 21-R-Ls	PARi	SH 21-R-Ci	Ci/Ca	SH 21-R-Ls	in	CK-Ci	out	CK-Ls
15	0	448	1.25685	-0.25685	0	450	1.27117	-0.271173	1.11558	587.471	1.57341	-0.573414
14	10	416	1.17048	-0.170482	9	424	1.19927	-0.199271	10.8291	569.244	1.52437	-0.524368
13	19	389	1.08963	-0.0896348	20	408	1.16008	-0.160075	20.1742	535.124	1.43634	-0.436336
12	40	326	0.91317	0.0868301	40	393	1.13375	-0.133746	39.3509	519.714	1.40862	-0.40862
11	70	338	0.943048	0.0569524	71	351	1.01847	-0.0184703	68.7733	461.45	1.25551	-0.255514
10	99	328	0.916159	0.0838411	100	349	0.988155	0.0118452	99.5276	355.642	0.97583	0.0241695
9	201	269	0.749453	0.250547	200	310	0.884458	0.115542	200.143	232.119	0.645013	0.354987
8	400	257	0.714392	0.285608	399	317	0.912374	0.0876264	399.893	182.104	0.516149	0.483851
7	601	268	0.732462	0.267538	600	329	0.938475	0.0615245	600.072	187.315	0.543657	0.456343
6	800	279	0.755219	0.244781	800	326	0.921273	0.0787272	800.57	207.818	0.603797	0.396203
5	1001	300	0.808609	0.191391	1001	328	0.901873	0.0981271	999.457	217.685	0.634937	0.365063
4	1201	306	0.825594	0.174406	1201	325	0.887874	0.112126	1201.06	217.905	0.638002	0.361998
3	1500	297	0.803861	0.196139	1500	316	0.889192	0.110808	1499.88	218.25	0.642385	0.357615
2	1800	289	0.781422	0.218578	1801	316	0.877005	0.122995	1800.82	219.72	0.645077	0.354923
1	2001	292	0.79509	0.20491	1999	316	0.876021	0.123979	2000.01	221.208	0.647744	0.352256
