# Supplementary material for: Drought and rewatering effects on soybean photosynthesis, physiology and yield
Source: PeerJ journal article supplement (doi:10.7717/peerj.19658), 2025-07-03
Supplement: Pn_of_soybean.xls [file Pn_of_soybean.xls]

## Sheet: flowering
	FH-07	FL-07	CK	FFPD	FH-07-R	FL-07-R	FFPD	FH-14	FL-14	CK	FFPD
15	-2.26483	-2.60991	-3.26065	0.901931	-4.11814	-4.20021	2.29243	-3.85277	-3.66719	-2.98448	1.50984
14	-1.96894	-2.35522	-2.38791	11.0143	-3.0579	-3.62278	9.2239	-2.27021	-2.11138	-2.1152	9.82553
13	-1.61697	-1.6003	-1.31795	20.7204	-2.80984	-2.91162	19.7809	-1.73627	-1.67235	-1.15428	20.2971
12	-0.344942	-0.742579	-0.37652	40.4781	-1.90503	-2.74498	40.2608	-1.0684	-0.944397	-0.0296224	38.7381
11	0.922953	0.905616	1.21916	68.9701	-1.1759	-1.14596	69.6425	0.151835	1.08173	1.25459	69.3289
10	2.42521	2.56924	2.66853	100.381	-0.602916	-0.416268	100.119	1.03837	1.40589	2.89251	99.344
9	6.60201	6.554	7.23086	199.366	1.8603	2.10858	200.024	2.80985	2.49945	5.83392	199.528
8	11.8296	12.2108	12.6908	400.151	5.03688	5.27212	398.772	4.19097	5.99334	6.80016	398.944
7	15.4508	15.089	15.7532	600.256	7.26094	7.30425	601.364	4.23665	6.29946	8.41136	601.554
6	17.3609	17.8809	18.2303	800.68	8.23904	8.58594	799.095	4.60175	6.50088	8.85353	799.94
5	19.5585	19.3081	19.2219	1000.91	8.58526	8.85721	1000.27	5.0791	6.83114	9.18294	1001.17
4	20.2707	20.8227	20.0155	1201.22	9.05871	9.2924	1200.77	5.81345	6.95495	9.81701	1201.37
3	20.6027	22.088	21.2579	1501.41	9.94407	10.0558	1501	6.24747	7.08736	10.2806	1499.1
2	21.778	22.7427	21.0673	1800.04	10.2116	10.7633	1800.92	6.46818	7.562	10.5463	1800.58
1	21.9508	22.8765	21.059	2000.81	10.3695	10.7866	1998.62	6.5925	7.65168	10.7346	2000.27
	FH-21	FL-21	FL-14-R	FH-14-R	CK	PPFD
15	-1.73293	-4.27446	-2.78353	-3.174	-3.37832	1.0004
14	-1.30213	-2.76976	-2.68419	-2.56215	-2.21568	10.8624
13	-0.60275	-2.69646	-1.56291	-1.72818	-1.84567	20.3369
12	-0.547455	-0.749877	-1.01773	-0.704875	-1.47445	40.6581
11	0.902871	0.09328	0.120571	0.249298	0.40788	70.3864
10	1.66637	1.04736	1.78027	1.71719	2.62516	98.9283
9	2.68374	3.86521	4.69845	4.69425	6.39213	200.954
8	4.14219	7.19252	8.98134	7.8802	13.9179	399.569
7	5.10498	7.53307	11.6426	9.4529	15.6536	601.434
6	5.41437	7.95606	13.4636	10.2421	17.1412	800.088
5	5.35968	8.85749	14.4198	10.5972	18.256	998.892
4	5.28644	10.2857	15.4649	11.2723	19.0618	1200.11
3	5.31984	10.8654	16.5268	11.1163	19.7331	1500.78
2	5.59038	11.503	17.4922	11.2967	20.9772	1801.17
1	5.75041	11.7557	17.8729	11.3655	21.1343	2001.1
	FL-21-R	FH-21-R	CK	PPFD
14	-2.16	-3.28	-1.8385	1
13	-1.6	-2.79	-1.18788	10
12	0.129	-1.14	-0.686659	20
11	-0.135	-0.755	0.524026	39
10	1.91	2.24	1.59969	70
9	3.25	1.9	2.13168	99
8	7.63	5.25	6.8033	200
7	11.8	9.97	11.4317	399
6	13.2	11.7	14.4308	600
5	14.3	12.5	17.2298	801
4	14.8	13.5	18.542	1000
3	15.8	14.4	19.9031	1200
2	17.1	15.1	20.7451	1500
1	17.1	15.3	21.4699	1800

## Sheet: grain-filling
	SH-07	FFPD	SL-07	FFPD	CK	PPFD	SL-07-R	PPFD	SH-07-R	PPFD
15	-1.543	1.67303	-1.49394	0.667831	-3.37832	0.774117	-1.33886	1.63941	-1.8501	0.730247
14	-1.48652	9.98484	-1.45299	10.7691	-2.21568	10.7051	-1.29782	9.95578	-1.36188	10.684
13	-1.343	21.0413	-1.27614	18.5895	-1.84567	20.2863	-1.13354	20.9214	-0.711309	18.6928
12	-0.41652	40.4998	-0.389641	39.6741	-0.474448	41.2592	-0.36955	40.1956	0.269255	39.7927
11	0.784383	69.9752	0.882571	68.7812	0.99788	69.1741	0.369808	69.8108	2.12508	69.6165
10	2.73606	100.802	2.79886	100.242	2.62516	99.8717	1.90276	100.957	3.03994	100.699
9	5.96149	199.434	7.05393	200.095	7.39213	200.424	4.70508	201.322	5.69292	200.042
8	7.52187	400.006	8.23599	401.136	12.9179	400.056	6.77631	399.703	8.39382	399.288
7	8.7728	601.015	9.74514	601.416	15.6536	600.922	8.74191	601.161	9.41685	600.766
6	9.33547	799.647	10.9194	800.392	17.1412	800.442	9.44714	801.194	10.0708	799.019
5	10.0744	999.816	11.1198	999.835	18.256	1000.73	9.47327	999.716	11.124	1000.18
4	10.3562	1200.06	11.4281	1200.18	19.0618	1199.99	10.0128	1200.87	12.1736	1200.04
3	11.0338	1500.51	12.0175	1501.13	19.7331	1500.27	10.0814	1500.89	12.5776	1500.15
2	11.2021	1799.82	12.089	1800.32	20.9772	1800.53	10.7896	1800.18	13.8522	1801.15
1	11.3745	2000.02	12.2438	1998.98	21.1343	2000.43	11.042	1999.15	13.992	2000.83
	SH-21	FFPD	SL-21	FFPD	CK	FFPD	SH-14-R	FFPD	SL-14-R	FFPD
15	-2.0723	1	-1.9	1	-1.8385	0	-2.26	1	-1.44	2
14	-1.852	10	-1.36	10	-1.18788	9	-1.62	10	-0.757	10
13	-0.1035	20	-0.959	20	-0.686659	19	-1.33	19	0.715	20
12	0.023	41	0.18	41	0.524026	40	0.606	40	0.996	40
11	0.277	70	0.59	70	1.59969	70	2.22	70	1.43	70
10	1.21	101	1.77	100	5.13168	100	3.18	100	4.28	100
9	2.11	200	2.56	200	8.8033	199	5.06	200	6.04	200
8	3.26	401	3.98	400	13.4317	400	6.99	401	10.4	399
7	4.26	601	4.85	600	15.4308	601	7.1	599	10.6	600
6	4.28	799	5.12	801	17.2298	800	7.29	799	11.1	802
5	4.3	1001	5.33	1000	18.542	1002	7.31	999	11.2	1001
4	4.48	1200	5.35	1201	19.9031	1201	7.37	1201	11.3	1200
3	4.64	1500	5.46	1500	20.7451	1500	8.01	1501	11.4	1501
2	4.75	1800	5.76	1800	21.4699	1799	8.27	1801	11.7	1800
1	4.81	2000	5.81	1999	21.4699	2000	8.33	2001	11.8	2000
	CK	PPFD	SL-21-R	PPFD	SH-21-R	PPFD
15	-1.1	0	-0.236	0	0.428	1
14	-0.353	10	0.376	9	0.693	11
13	0.547	19	0.71	20	0.588	19
12	1.86	40	1.06	40	1.24	39
11	2.92	70	2.01	71	1.83	70
10	4.15	99	3.06	100	4.27	101
9	8.01	201	4.99	200	5.43	198
8	11.1	400	6.78	399	6.32	401
7	13.8	601	7.21	600	6.84	601
6	14	800	7.85	800	6.85	800
5	14.1	1001	7.92	1001	7	1000
4	14.3	1201	8.1	1201	7.22	1200
3	14.4	1500	8.3	1500	7.66	1501
2	14.5	1801	8.43	1801	8.06	1800
1	14.8	2000	8.74	1999	8.09	2000
